# Supplementary material for: Template-assisted synthesis of Ag/AgCl hollow microcubes and their composition-dependent photocatalytic activity for the degradation of phenol
Source: Royal Society of Chemistry journal article supplement (doi:10.1039/d1ra03569j), 2021-01-01
Supplement: d1ra03569j3.pdf [file d1ra03569j3.pdf]

# Template-assisted synthesis of Ag/AgCl hollow microcubes and their composition-dependent photocatalytic activity for the degradation of phenol

Shiyun Lou, Qinglan Chen, Wan Wang, Yongqiang Wang, Shaomin Zhou\*

Key Laboratory for Special Functional Materials of the Ministry of Education, Henan University, Kaifeng, 475004,

PR China

E-mail address: [shaominzhou@yahoo.com](mailto:shaominzhou@yahoo.com)

## Supporting Information:

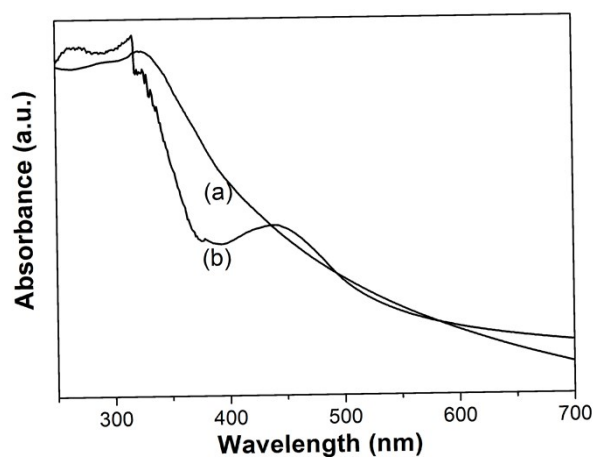

Fig. S1. UV-Vis absorption spectra of (a) N-TiO<sub>2</sub> and (b) P25-TiO<sub>2</sub>/Ag samples.

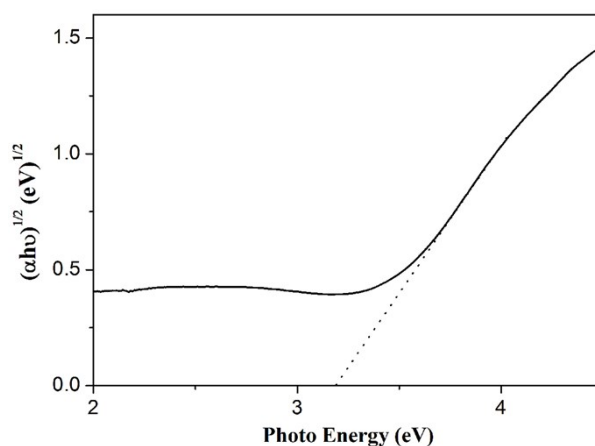

Fig. S2. Plots of the  $(\alpha h\nu)^{1/2}$  vs photon energy ( $h\nu$ ) for AgCl.
