# Supplementary figures and images for: Template-assisted synthesis of Ag/AgCl hollow microcubes and their composition-dependent photocatalytic activity for the degradation of phenol
Source: Royal Society of Chemistry journal article supplement (doi:10.1039/d1ra03569j), 2021-01-01

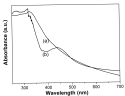

Supplement: d1ra03569j2.pdf [file d1ra03569j2.pdf]
